# Supplementary material for: Mesoporous slit-structured NiO for high-performance pseudocapacitors
Source: Royal Society of Chemistry journal article supplement (doi:10.1039/c2cp41604b), 2012-01-01
Supplement: c2cp41604b.pdf [file c2cp41604b.pdf]

Cite this: DOI: 10.1039/c0xx00000x

www.rsc.org/xxxxxx

ARTICLE TYPE

## Mesoporous Slit-Structure NiO for High-Performance Pseudocapacitors

M. Yang, J. X. Li, H. H. Li, L.W. Su, J. P. Wei, Z. Zhou\*

Received (in XXX, XXX) Xth XXXXXXXXXX 200X, Accepted Xth XXXXXXXXXX 200X

DOI: 10.1039/b000000x

5

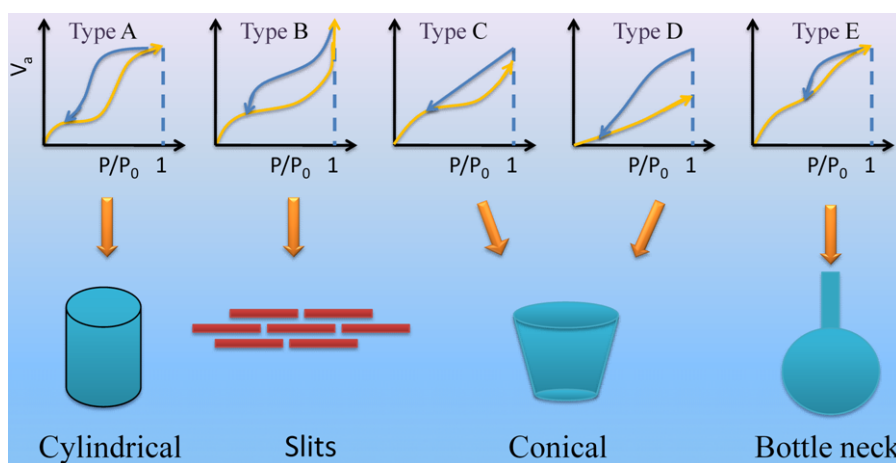

Fig. S1. Correlations between hysteresis loops and pore shapes reproduced from Ref. [21]

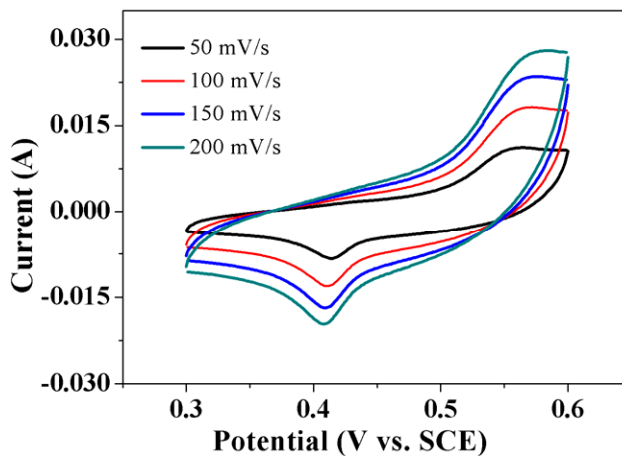

Fig. S2. CV curves of the as-synthesized NiO sample at different scan rates.

10

15

Cite this: DOI: 10.1039/c0xx00000x

www.rsc.org/xxxxxx

ARTICLE TYPE

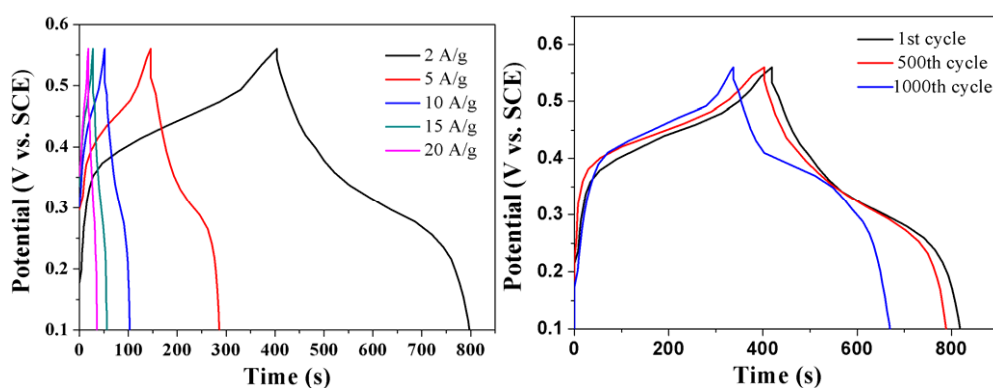

Fig. S3. (a) Charge and discharge curves of the NiO at different current densities; (b) Charge and discharge curves of the 1<sup>st</sup>, 500<sup>th</sup> and 1000<sup>th</sup> cycle at a current density of 2 A g<sup>-1</sup>.

5

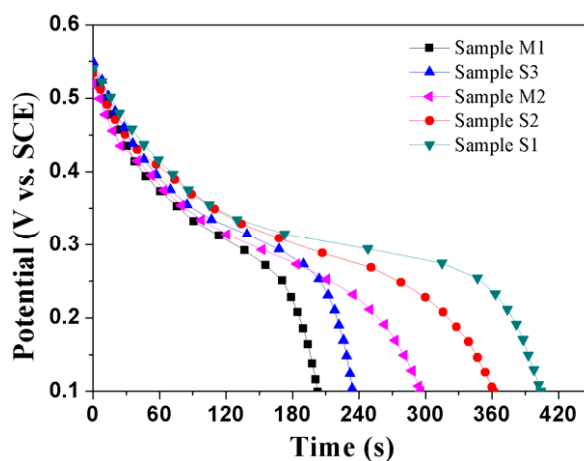

Fig. S4. Discharge curves of different NiO samples measured with a current density of 2 A g<sup>-1</sup> in 6 M KOH.

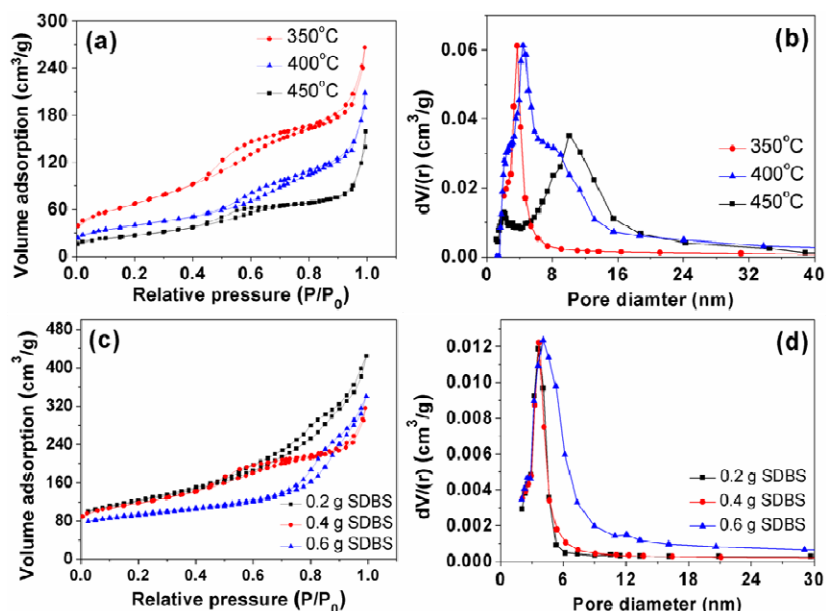

Fig. S5. (a) Nitrogen adsorption-desorption isotherms of the NiO samples calcined at different temperatures; (b) The corresponding pore-size distribution of (a); (c) Nitrogen adsorption-desorption isotherms with different amounts of SDBS; (d) The corresponding pore-size distribution derived from (c).

5

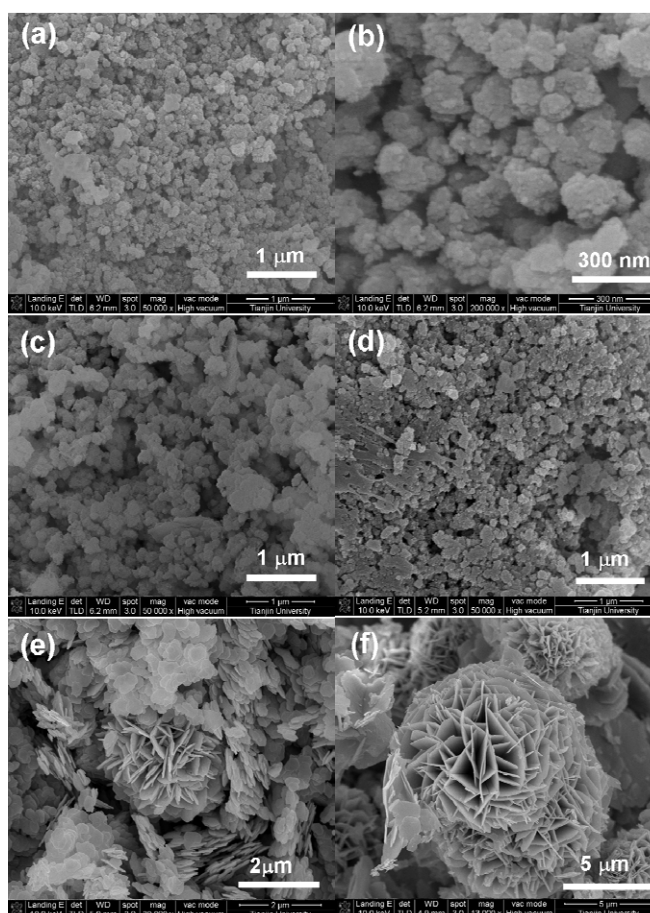

Fig. S6. SEM images of (a) sample S1; (b) high resolution of (a); (c) sample S2; (d) sample S3; (e) sample M1; sample M2.

10
